# Supplementary material
Source: bioRxiv or medRxiv preprint supplement (https://medrxiv.org/highwire/filestream/93055/field_highwire_adjunct_files/0/2020.08.11.20171843-1.pdf)
Supplement: Supplementary file [file 2020.08.11.20171843-1.pdf]

**Supplemental Table 1**

| Marker                            | Fluorochrome | Clone     | Supplier      |
|-----------------------------------|--------------|-----------|---------------|
| <b>Innate cell surface panel</b>  |              |           |               |
| CD16                              | BUV395       | 3G8       | BD            |
| Live/Dead Blue                    | BUV450       | N/A       | Thermo Fisher |
| CD15                              | BUV563       | W6D3      | BD            |
| CD14                              | BUV615       | M5E2      | BD            |
| CD56                              | BUV737       | NCAM16.2  | BD            |
| CD31                              | BV421        | WM59      | BioLegend     |
| HLADR                             | BV510        | L243      | BioLegend     |
| CD11c                             | BV605        | 3.9       | BioLegend     |
| CD3                               | BV650        | OKT3      | BioLegend     |
| CD19                              | BV650        | H1B19     | BioLegend     |
| CD10                              | BV711        | H110a     | BioLegend     |
| CD123                             | BV785        | 6H6       | BioLegend     |
| FCAR                              | FITC         | A59       | BioLegend     |
| CD66b                             | PerCp Cy5.5  | G10F5     | BioLegend     |
| CD9                               | PE           | HI9a      | BioLegend     |
| CD163                             | PE-Cy7       | GHI/61    | BioLegend     |
| CD41                              | APC          | HIP8      | BioLegend     |
| CD304                             | APC-Fire     | 12C2      | BioLegend     |
| <b>B cell surface panel</b>       |              |           |               |
| Tetramer                          | PE           |           |               |
| Decoy                             | PE-Cy5       |           |               |
| CD19                              | FITC         | H1B19     | BD            |
| CD20                              | P5.5         | 2H7       | BD            |
| CD3 (dump)                        | BV711        | UCHT1     | BD            |
| CD14 (dump)                       | BV711        | MφP9      | BD            |
| CD16 (dump)                       | BV711        | 3G8       | BD            |
| IgM                               | BV510        | MHM-88    | BioLegend     |
| IgD                               | PE-Cy7       | IA6-2     | BD            |
| IgG                               | BV786        | G18-145   | BD            |
| CD21                              | SB600        | HB5       | Thermo        |
| CD27                              | BV421        | M-T271    | BioLegend     |
| CD38                              | AF700        | HIT2      | BD            |
| IgA                               | Biotin       | IS11-8E10 | Miltenyi      |
| Streptavidin                      | BUV395       |           | BD            |
| <b>B cell intracellular panel</b> |              |           |               |
| Tetramer                          | PE           |           |               |
| Decoy                             | PE-Cy5       |           |               |
| CD19                              | FITC         | H1B19     | BD            |
| CD20                              | P5.5         | 2H7       | BD            |
| CD3 (dump)                        | APC-Cy7      | HIT3a     | BioLegend     |
| CD14 (dump)                       | APC-Cy7      | M5E2      | BioLegend     |
| CD16 (dump)                       | APC-Cy7      | 3G8       | BD            |
| IgM                               | BV510        | MHM-88    | BioLegend     |
| IgD                               | PE-Cy7       | IA6-2     | BD            |
| IgG                               | BV786        | G18-145   | BD            |
| CD21                              | SB600        | HB5       | Invitrogen    |
| CD27                              | BV711        | M-T271    | BioLegend     |
| CD38                              | AF700        | HIT2      | BD            |
| Live/dead                         | ef780        |           | ThermoFisher  |
| FCLR5                             | EF660        | 509F6     | Invitrogen    |
| CD11c                             | PEdazzle594  | 3.9       | BioLegend     |
| Tbet                              | BV421        | 4B10      | BioLegend     |
| Ki67                              | BUV395       | B56       | BD            |
| <b>T cell Phenotyping Panel</b>   |              |           |               |
| Ki-67                             | BUV395       | B56       | BD            |
| Live/Dead Blue                    | BUV496       | N/A       | ThermoFisher  |
| CD45RA                            | BUV737       | HI 100    | BD            |
| CXCR5                             | BV421        | RF8B2     | BD            |
| CD3                               | BV510        | UCHT1     | BD            |
| CD4                               | BV605        | SK3       | BioLegend     |
| CCR6                              | BV650        | 11A9      | BD            |
| CD19                              | BV711        | SJ25C1    | BD            |
| CD16                              | BV711        | 3G8       | BD            |
| CD14                              | BV711        | M5E2      | BD            |
| CD8                               | BV750        | SK1       | BD            |
| CCR7                              | BV785        | G04387    | BioLegend     |
| FoxP3                             | AF488        | 259D/C7   | BD            |
| ICOS                              | Percp-eF710  | ISA-3     | ThermoFisher  |
| Bcl-6                             | PE           | 7D1       | BioLegend     |
| Blimp-1                           | PE CF594     | 6D3       | BD            |
| CXCR3                             | PE Cy5       | IC6/CXCR3 | BD            |
| T-bet                             | PE Cy7       | 4B10      | BioLegend     |
| PD-1                              | APC          | EH12, 2H7 | BioLegend     |
| CD38                              | AF700        | HIT2      | BD            |
| HLA-DR                            | APC H7       | L243      | BioLegend     |

| Marker                                     | Fluorochrome        | Clone        | Supplier        |
|--------------------------------------------|---------------------|--------------|-----------------|
| <b>T cell surface panel</b>                |                     |              |                 |
| <b>Marker</b>                              | <b>Fluorochrome</b> | <b>Clone</b> | <b>Supplier</b> |
| CD3                                        | BUV395              | SK7          | BD              |
| CD45RA                                     | BUV737              | HI100        | BD              |
| CXCR3                                      | BV421               | BVD2-21C11   | BD              |
| CCR7                                       | BV605               | G04347       | BioLegend       |
| CCR6                                       | BV650               | OKT4         | BioLegend       |
| CD4                                        | BV711               | OKT4         | BioLegend       |
| CD127                                      | BV786               | hIL7Rm21     | BD              |
| pan-gdTCR                                  | PerCP/ef710         | B1           | BioLegend       |
| CCR10                                      | PE                  | REA173       | R&D             |
| CCR4                                       | PE/Dazzle594        | L291H4       | BioLegend       |
| CD25                                       | PE/Cy5              | BC96         | BioLegend       |
| CD8a                                       | PE/Cy7              | SK1          | ThermoFisher    |
| CD19                                       | Ax700               | SJ25C1       | ThermoFisher    |
| LiveDead                                   | APC/ef780           | n/a          | ThermoFisher    |
| <b>T cell cytokine panel</b>               |                     |              |                 |
| <b>Marker</b>                              | <b>Fluorochrome</b> | <b>Clone</b> | <b>Supplier</b> |
| CD3                                        | BUV395              | SK7          | BD              |
| Live/Dead Blue                             | BUV496              | n/a          | ThermoFisher    |
| CD45RA                                     | BUV737              | HI100        | BD              |
| CD8a                                       | BV510               | SK1          | BioLegend       |
| CD19                                       | BV605               | SJ25C1       | BioLegend       |
| CCR7                                       | BV605               | G04347       | BioLegend       |
| CD4                                        | BV650               | OKT4         | BioLegend       |
| IL-4                                       | FITC                | MP4-25D2     | BioLegend       |
| IL-13                                      | PE                  | JES10-5A2    | BioLegend       |
| IL17a                                      | PE/Dazzle594        | BL168        | BioLegend       |
| IL-22                                      | PE/Cy7              | 22URT1       | ThermoFisher    |
| IFNγ                                       | Ax700               | 4S.B3        | BioLegend       |
| pan-gdTCR                                  | APC/Fire75          | B1           | BioLegend       |
| <b>T cell sort and restimulation panel</b> |                     |              |                 |
| <b>Marker</b>                              | <b>Fluorochrome</b> | <b>Clone</b> | <b>Supplier</b> |
| CD45RA                                     | BUV737              | HI100        | BD              |
| CXCR3                                      | BV421               | BVD2-21C11   | BD              |
| CD8a                                       | BV510               | SK1          | BioLegend       |
| CCR7                                       | BV605               | G04347       | BioLegend       |
| CCR6                                       | BV650               | OKT4         | BioLegend       |
| CD4                                        | BV711               | OKT4         | BioLegend       |
| CXCR5                                      | BB515               | RF8B2        | BD              |
| pan-gdTCR                                  | PerCP/ef710         | B1           | BioLegend       |
| CCR10                                      | PE                  | REA173       | R&D             |
| CCR4                                       | PE/Dazzle594        | L291H4       | BioLegend       |
| CD25                                       | PE/Cy5              | BC96         | BioLegend       |
| CD127                                      | PE/Cy7              | hIL7Rm21     | ThermoFisher    |
| CPD                                        | e670                | n/a          | ThermoFisher    |
| CD19                                       | Ax700               | SJ25C1       | ThermoFisher    |
| LiveDead                                   | APC/ef780           | n/a          | ThermoFisher    |
| <b>T cell ex vivo stim panel</b>           |                     |              |                 |
| CD69                                       | BUV395              | FN50         | BD              |
| Live/Dead Blue                             | BUV496              | N/A          | ThermoFisher    |
| CD45RA                                     | BUV737              | HI100        | BD              |
| CXCR5                                      | BV421               | RF8B2        | BD              |
| CD3                                        | BV510               | UCHT1        | BD              |
| CD4                                        | BV605               | SK3          | BioLegend       |
| CCR6                                       | BV650               | 11A9         | BD              |
| CD19                                       | BV711               | SJ25C1       | BD              |
| CD16                                       | BV711               | 3G8          | BD              |
| CD14                                       | BV711               | M5E2         | BD              |
| CD8                                        | BV750               | SK1          | BD              |
| CCR7                                       | BV785               | G04387       | BioLegend       |
| CD40L                                      | FITC                | 24-31        | ThermoFisher    |
| ICOS                                       | Percp-eF710         | ISA-3        | ThermoFisher    |
| IL-21                                      | PE                  | eBio3A3-N2   | ThermoFisher    |
| IL-17A                                     | PE Dz594            | BL168        | BioLegend       |
| CXCR3                                      | PE Cy5              | IC6/CXCR3    | BD              |
| IL-4                                       | PE Cy7              | MP4-25D2     | BioLegend       |
| IL-6                                       | AF647               | MQ2-13A5     | BioLegend       |
| IL-2                                       | AF700               | MQ1-17H12    | BioLegend       |
| IFNγ                                       | APC H7              | 4S.B3        | BioLegend       |
| <b>Mouse B cell panel</b>                  |                     |              |                 |
| <b>Marker</b>                              | <b>Fluorochrome</b> | <b>Clone</b> | <b>Supplier</b> |
| RBD tetramer                               |                     |              |                 |
| Decoy tetramer                             |                     |              |                 |
| CD4                                        | FITC                | GK1.5        | BD              |
| CD8                                        | FITC                | 53.67        | BD              |
| B220                                       | BV711               | RA3-6B2      | BD              |
| CD138                                      | BV605               | 281-2        | BD              |
| CD38                                       | AF700               | 90           | ThermoFisher    |
| G17                                        | ef450               | GL-7         | ThermoFisher    |

**Supplemental Table 1. Antibody information for flow cytometry experiments**
